# Supplementary material
Source: PubMed Central journal article supplement (PMC6237480)
Supplement: jciinsight-3-122673-s148.pdf [file jciinsight-3-122673-s148.pdf]

## Supplemental Figure 1

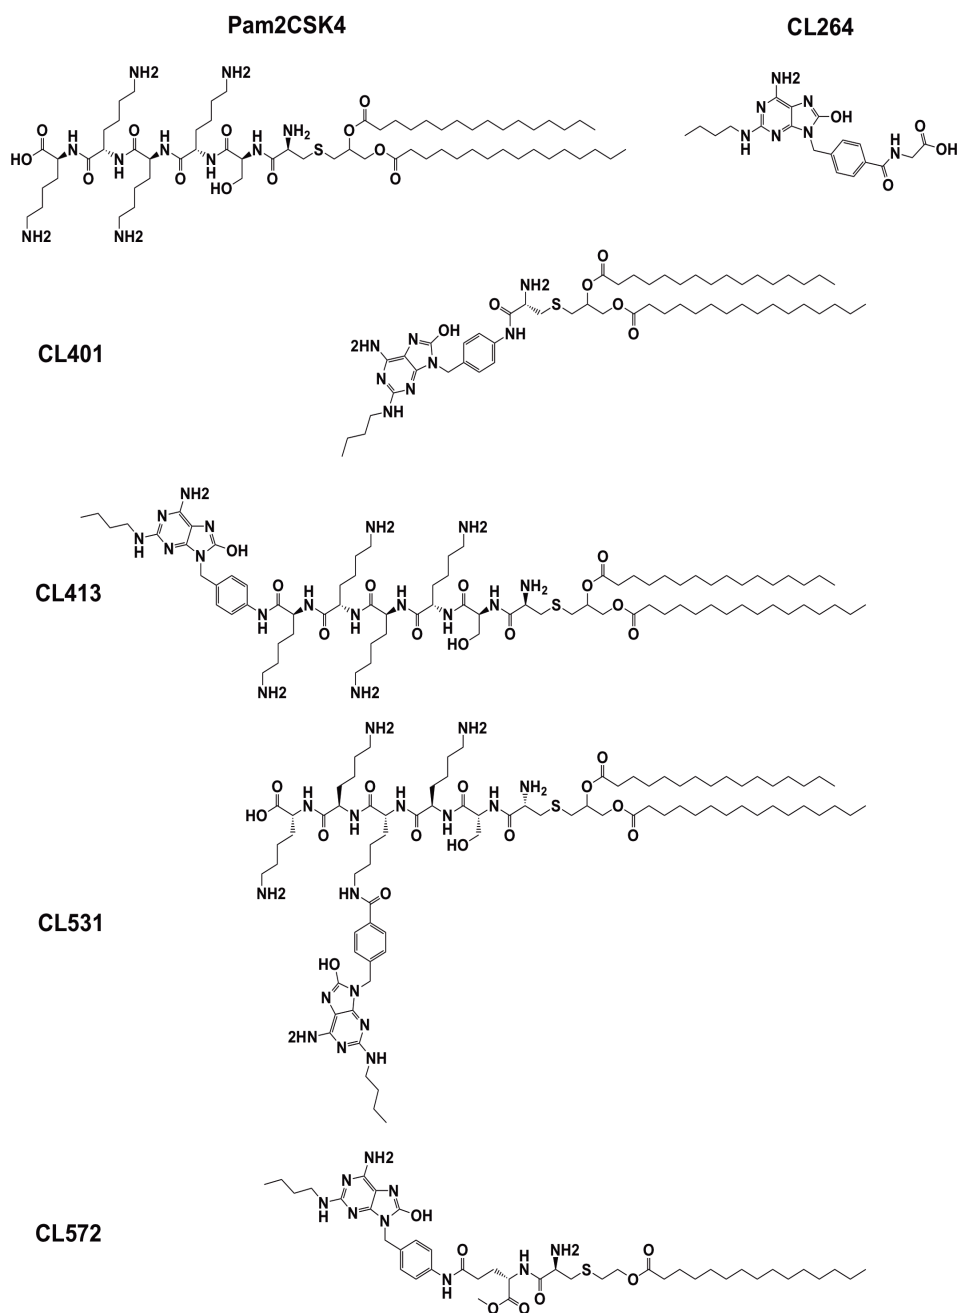

**Supplemental Figure 1. Chemical structure of TLR ligands.** Chemical structure of Pam2CSK4 (TLR2 agonist), CL264 (TLR7 agonist), and 3 dual TLR2/7 agonists CL413, CL531 and CL572.

Supplemental Figure 2

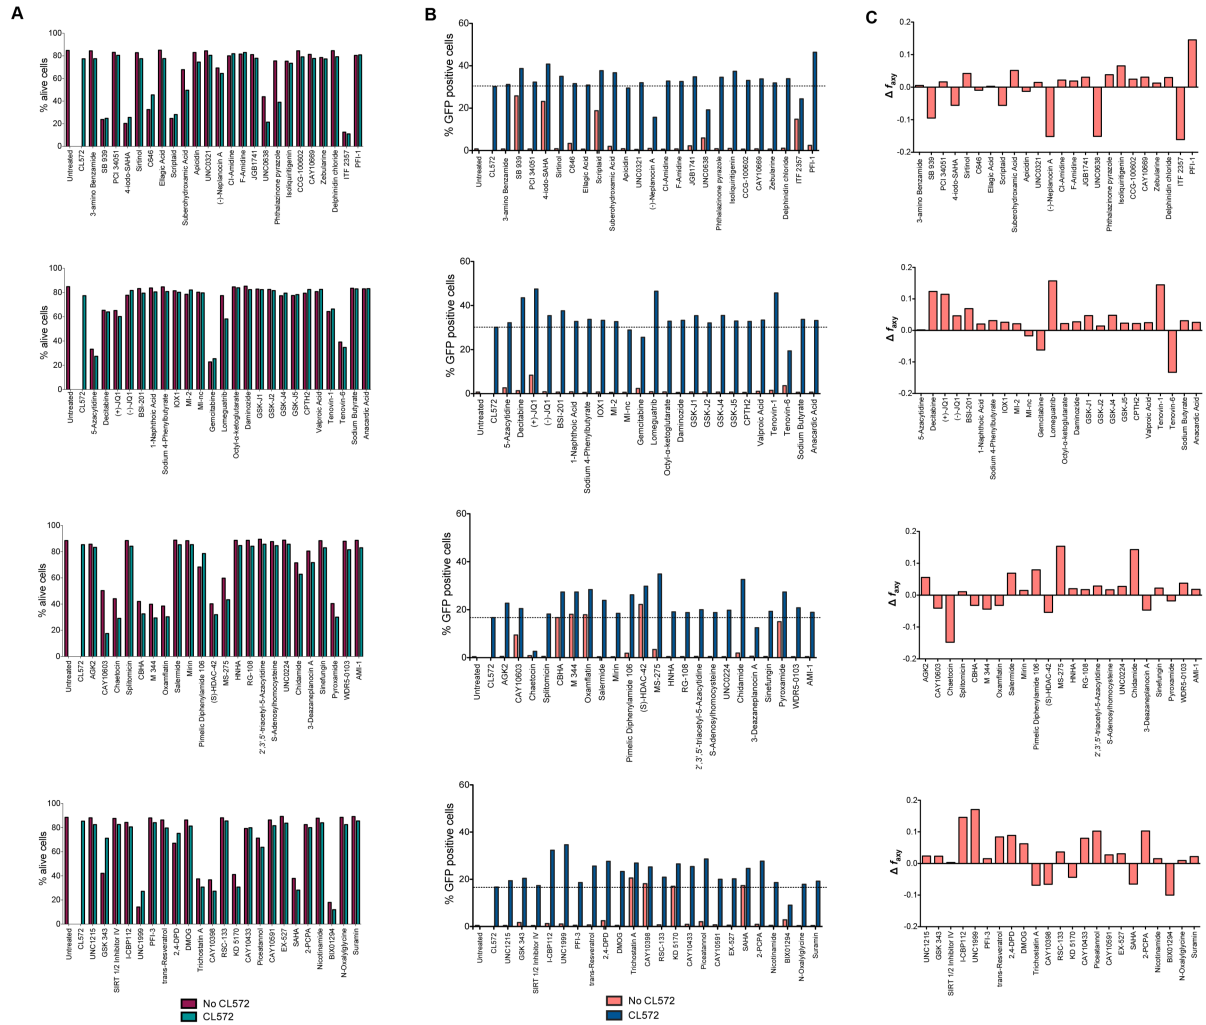

**Supplemental Figure 2. Screening of epigenetic modulators in JLAT-TLR2.** 94 epigenetic modulators were tested for their ability to reactivate latent HIV in JLAT-TLR2 at 10  $\mu$ M either alone or in combination with 1  $\mu$ M of CL572. Cell viability (**A**) and viral reactivation (**B**) were assessed by flow cytometry. (**C**) Synergism between the epigenetic modulator and CL572 was calculated using the Bliss independence model.

### Supplemental Figure 3

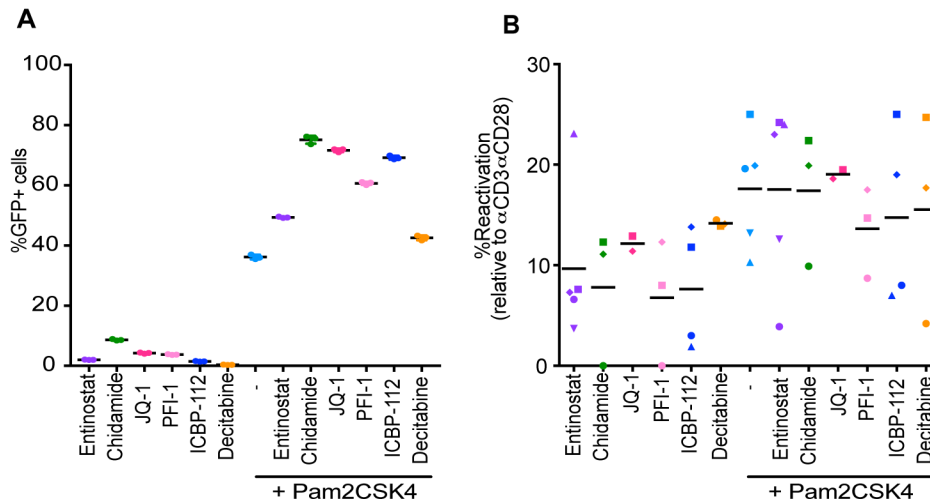

**Supplemental Figure 3. HIV reactivation by combination of epigenetic modulators with Pam2CSK4.** (A) Viral reactivation mediated by 6 epigenetic modulators at 10  $\mu$ M either alone or in the presence of 1  $\mu$ M of the TLR2 agonist Pam2CSK4 in JLAT-TLR2. Data is representative of 3 independent experiments using triplicates and horizontal line represent mean. (B) Viral reactivation relative to  $\alpha$ CD2/ $\alpha$ CD28 mediated by 6 epigenetic modulators at 10  $\mu$ M either alone or in the presence of 1  $\mu$ M of the TLR2 agonist Pam2CSK4 in the T<sub>CM</sub> model of latency. Each symbol corresponds to a different donor and horizontal line represent mean.

**Supplemental Figure 4**

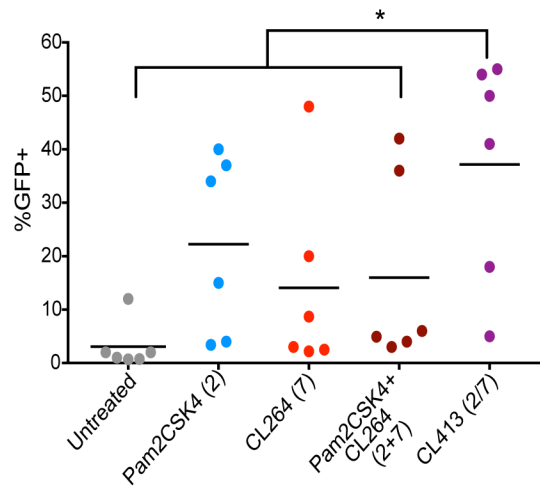

**Supplemental Figure 4. Comparison between dual TLR2/7 agonists and simultaneous administration of a TLR2 and a TLR7 agonist.** PBMCs were either left untreated or treated with either Pam2CSK4, CL264, a combination of both, or the dual TLR2/7 agonist CL413. Supernatants were tested in their ability to induce viral reactivation in JLAT10.6 (n=6). Horizontal lines indicate media of values. \*P < 0.05, by two-tailed Wilcoxon matched-pairs signed-ranks. Each dot corresponds to one donor.

### Supplemental Figure 5

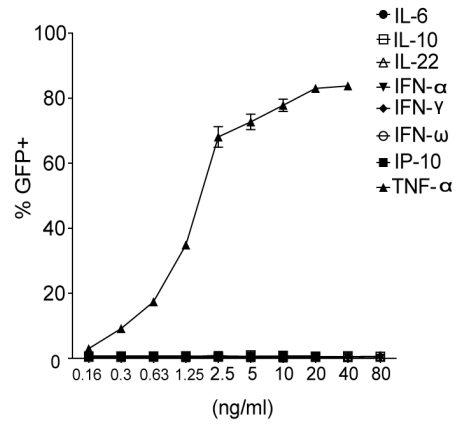

**Supplemental Figure 5. Reactivation of latent HIV in the cell line JLAT10.6 by several cytokines.** Dose-response of several recombinant cytokines in J-LAT-10.6. Data is representative of 3 independent experiments using triplicates. Values represent mean  $\pm$  SD.

### Supplemental Figure 6

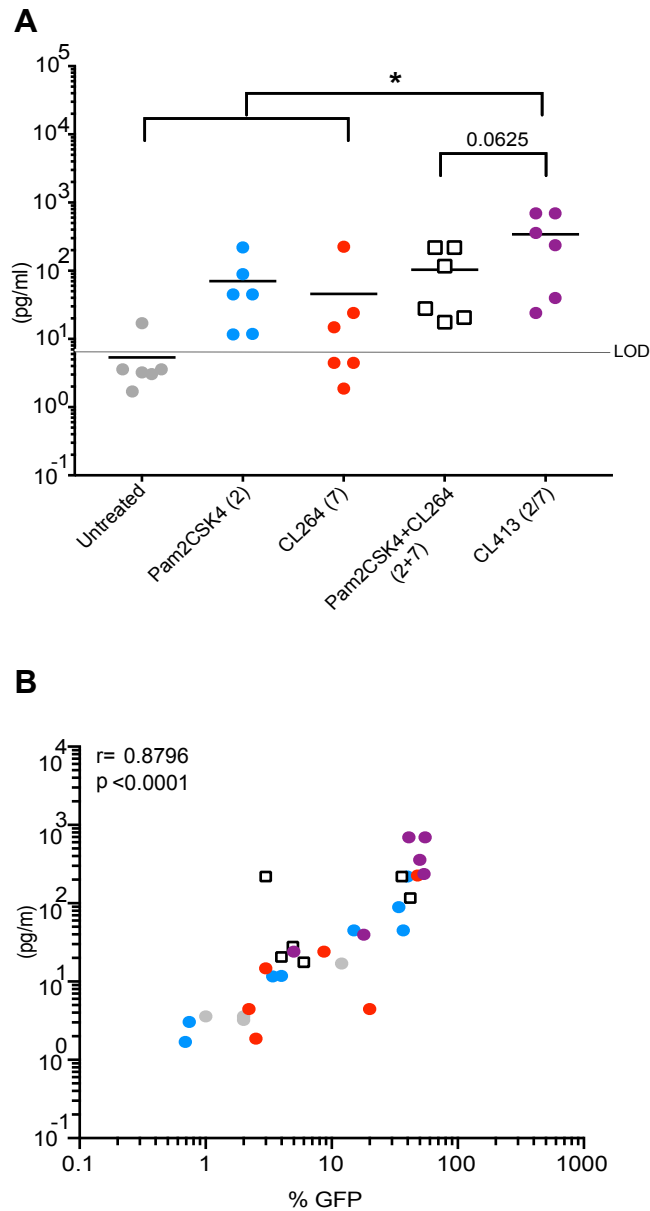

**Supplemental Figure 6. Comparison between dual TLR2/7 agonists and simultaneous administration of a TLR2 and a TLR7 agonist in their ability to induce TNF- $\alpha$ .** (A) PBMCs were either left untreated or treated with either Pam2CSK4, CL264, a combination of both, or the dual TLR2/7 agonist CL413. Supernatants were tested in their ability to induce produce TNF- $\alpha$  (n=6). Horizontal lines indicate media of values. \*P

< 0.05, by two-tailed Wilcoxon matched-pairs signed-ranks. Each dot corresponds to one donor **(B)** Spearman correlation between the concentration of TNF- $\alpha$  with the ability of the supernatants to reactivate JLAT10.6.

### Supplemental Figure 7

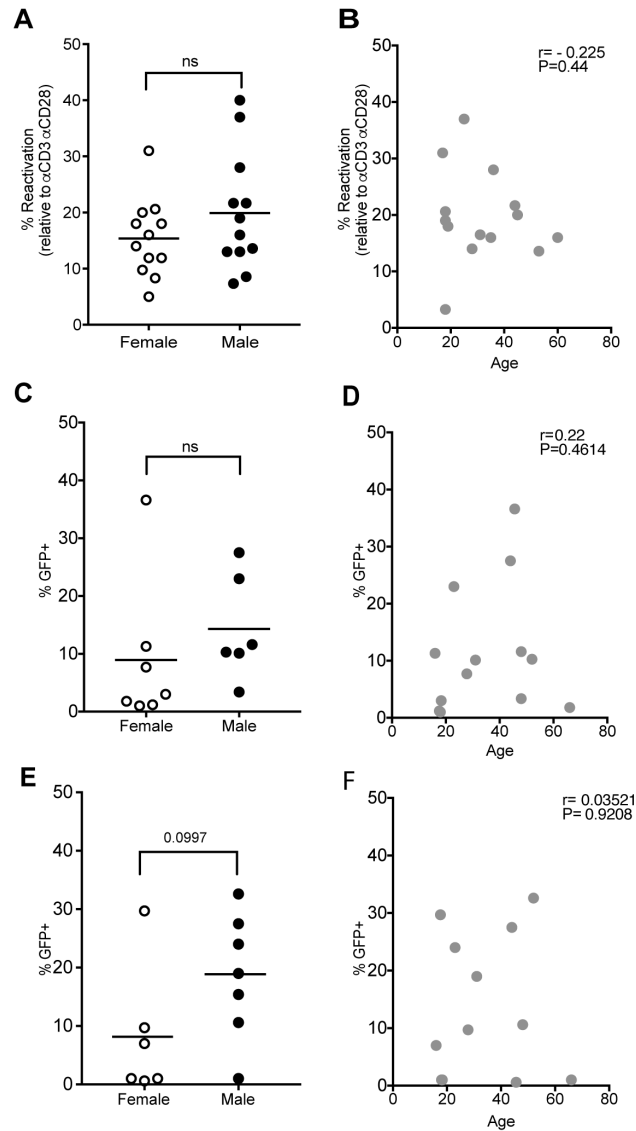

**Supplemental Figure 7. Influence of sex in direct and indirect reactivation of HIV by TLR2 or TLR7 agonists. A.** Comparison of the levels of reactivation by Pam2CSK4 in the T<sub>CM</sub> model between female and male donors (n=12 each group). **B.** Correlation between age and the ability of Pam2CSK4 to reactivate HIV. **C.** Comparison of the ability of supernatants from PBMC stimulated with GS-9620 from female and male donors to reactivate latent HIV in the cell line JLAT10.6 (n=7 each group). **D.** Correlation between



age and the ability of supernatants of GS-9620-treated PBMCs to reactivate latent HIV.

**E.** Comparison of the ability of supernatants from PBMC stimulated with CL413 from female and male donors to reactivate latent HIV in the cell line JLAT10.6 (n=7 each group). **F.** Correlation between age and the ability of supernatants of CL413-treated PBMCs to reactivate latent HIV. Mann-Whitney U test was used for comparisons between female and male. Correlations were determined using two-tailed non parametric Spearman correlation coefficient.

## Supplemental Tables

**Supplemental Table 1. NK cell activation**

| versus   | Pam2CSK4 | CL264 | GS9620 | CL413 | CL531 | CL572 | PMA/ION |
|----------|----------|-------|--------|-------|-------|-------|---------|
| Media    | ***      | ***   | ***    | ***   | ***   | ***   | ***     |
| Pam2CSK4 |          | **    | ns     | ns    | ns    | *     | ns      |
| CL264    |          |       | ***    | **    | ***   | ***   | **      |
| GS-9620  |          |       |        | ns    | ns    | ns    | ns      |
| CL413    |          |       |        |       | *     | ns    | ns      |
| CL531    |          |       |        |       |       | ***   | ns      |
| CL572    |          |       |        |       |       |       | ns      |

**Supplemental Table 1.** Statistical analysis of the ability of the different TLR agonists to induce NK cell activation. \*P < 0.05, \*\*P < 0.01, and \*\*\*P < 0.001, by two-tailed Wilcoxon matched-pairs signed-ranks.

**Supplemental Table 2. CD4T cell activation**

| versus   | Pam2CSK4 | CL264 | GS9620 | CL413 | CL531 | CL572 | PMA/ION |
|----------|----------|-------|--------|-------|-------|-------|---------|
| Media    | **       | **    | ***    | ***   | ***   | ***   | ***     |
| Pam2CSK4 |          | ns    | ns     | ns    | ns    | ns    | ***     |
| CL264    |          |       | **     | ***   | ***   | **    | ***     |
| GS-9620  |          |       |        | ns    | ns    | ns    | ***     |
| CL413    |          |       |        |       | ns    | ns    | ***     |
| CL531    |          |       |        |       |       | ns    | ***     |
| CL572    |          |       |        |       |       |       | ***     |

**Supplemental Table 2.** Statistical analysis of the ability of the different TLR agonists to induce CD4T cell activation. \*\*P < 0.05, \*\*P < 0.01, and \*\*\*P < 0.001, by two-tailed Wilcoxon matched-pairs signed-ranks.

**Supplemental Table 3. CD8T cell activation**

| versus   | Pam2CSK4 | CL264 | GS9620 | CL413 | CL531 | CL572 | PMA/ION |
|----------|----------|-------|--------|-------|-------|-------|---------|
| Media    | **       | *     | ***    | ***   | **    | ***   | ***     |
| Pam2CSK4 |          | **    | **     | ns    | ns    | **    | ***     |
| CL264    |          |       | ***    | **    | ***   | ***   | ***     |
| GS-9620  |          |       |        | **    | ***   | ns    | ***     |
| CL413    |          |       |        |       | ns    | **    | ***     |
| CL531    |          |       |        |       |       | ***   | ***     |
| CL572    |          |       |        |       |       |       | ***     |

**Supplemental Table 3.** Statistical analysis of the ability of the different TLR agonists to

induce CD8T cell activation. \*P < 0.05, \*\*P < 0.01, and \*\*\*P < 0.001, by two-tailed

Wilcoxon matched-pairs signed-ranks.

**Supplemental Table 4. IL-6**

| versus   | Pam2CSK4 | CL264 | GS9620 | CL413 | CL531 | CL572 | PMA/ION |
|----------|----------|-------|--------|-------|-------|-------|---------|
| Media    | **       | **    | **     | **    | **    | **    | **      |
| Pam2CSK4 |          | ns    | ns     | ns    | ns    | ns    | ns      |
| CL264    |          |       | ns     | **    | **    | **    | ns      |
| GS-9620  |          |       |        | **    | *     | **    | *       |
| CL413    |          |       |        |       | ns    | ns    | ns      |
| CL531    |          |       |        |       |       | ns    | ns      |
| CL572    |          |       |        |       |       |       | ns      |

**Supplemental Table 4.** Statistical analysis of the ability of the different TLR agonists to induce IL-6 secretion. \*P < 0.05, \*\*P < 0.01, and \*\*\*P < 0.001, by two-tailed Wilcoxon matched-pairs signed-ranks.

**Supplemental Table 5. IL-10**

| versus   | Pam2CSK4 | CL264 | GS9620 | CL413 | CL531 | CL572 | PMA/ION |
|----------|----------|-------|--------|-------|-------|-------|---------|
| Media    | **       | ns    | **     | **    | **    | **    | **      |
| Pam2CSK4 |          | ns    | ns     | **    | ns    | **    | ns      |
| CL264    |          |       | ns     | ns    | ns    | ns    | ns      |
| GS-9620  |          |       |        | *     | **    | **    | ns      |
| CL413    |          |       |        |       | *     | ns    | ns      |
| CL531    |          |       |        |       |       | **    | ns      |
| CL572    |          |       |        |       |       |       | ns      |

**Supplemental Table 5. Supplemental Table 4.** Statistical analysis of the ability of the

different TLR agonists to induce IL-10 secretion. \*P < 0.05, \*\*P < 0.01, and \*\*\*P <

0.001, by two-tailed Wilcoxon matched-pairs signed-ranks.

**Supplemental Table 6. IFN- $\gamma$** 

| versus   | Pam2CSK4 | CL264 | GS9620 | CL413 | CL531 | CL572 | PMA/ION |
|----------|----------|-------|--------|-------|-------|-------|---------|
| Media    | *        | ns    | **     | **    | **    | **    | **      |
| Pam2CSK4 |          | ns    | ns     | **    | ns    | *     | **      |
| CL264    |          |       | *      | **    | **    | **    | **      |
| GS-9620  |          |       |        | ns    | *     | **    | **      |
| CL413    |          |       |        |       | ns    | ns    | **      |
| CL531    |          |       |        |       |       | **    | **      |
| CL572    |          |       |        |       |       |       | **      |

**Supplemental Table 6. Supplemental Table 4.** Statistical analysis of the ability of the

different TLR agonists to induce IFN- $\gamma$  secretion. \*P < 0.05, \*\*P < 0.01, and \*\*\*P <

0.001, by two-tailed Wilcoxon matched-pairs signed-ranks.

**Supplemental Table 7. IL-22**

| versus   | Pam2CSK4 | CL264 | GS9620 | CL413 | CL531 | CL572 | PMA/ION |
|----------|----------|-------|--------|-------|-------|-------|---------|
| Media    | **       | ns    | ns     | *     | **    | **    | **      |
| Pam2CSK4 |          | *     | *      | *     | **    | **    | **      |
| CL264    |          |       | ns     | *     | **    | **    | **      |
| GS-9620  |          |       |        | *     | **    | **    | **      |
| CL413    |          |       |        |       | **    | ns    | **      |
| CL531    |          |       |        |       |       | ns    | **      |
| CL572    |          |       |        |       |       |       | **      |

**Supplemental Table 7.** Statistical analysis of the ability of the different TLR agonists to induce IL-22 secretion. \*P < 0.05, \*\*P < 0.01, and \*\*\*P < 0.001, by two-tailed Wilcoxon matched-pairs signed-ranks.



**Supplemental Table 8. IFN- $\alpha$** 

| versus   | Pam2CSK4 | CL264 | GS9620 | CL413 | CL531 | CL572 |  |
|----------|----------|-------|--------|-------|-------|-------|--|
| Media    | *        | *     | ***    | **    | **    | ***   |  |
| Pam2CSK4 |          | ns    | ns     | ns    | ns    | *     |  |
| CL264    |          |       | *      | ns    | ns    | *     |  |
| GS-9620  |          |       |        | *     | ns    | ns    |  |
| CL413    |          |       |        |       | ns    | **    |  |
| CL531    |          |       |        |       |       | ns    |  |
|          |          |       |        |       |       |       |  |

**Supplemental Table 8.** Statistical analysis of the ability of the different TLR agonists to induce IFN- $\alpha$  secretion. \*P < 0.05, \*\*P < 0.01, and \*\*\*P < 0.001, by two-tailed Wilcoxon matched-pairs signed-ranks.
